# Supplementary material for: Impact of Retinopathy and Systemic Vascular Comorbidities on All-Cause Mortality
Source: bioRxiv or medRxiv preprint supplement (doi:10.1101/2021.01.19.21249177), 2021-01-20
Supplement: Supplementary file [file media-3.pdf]

Supplement Table 3. Additional Effects from Vascular Comorbidities on All-Cause Mortality Using Cox Proportional Hazards Regression Models.

|                                                | <b>Model 1</b> <sup>a</sup> | <b>Model 2</b> <sup>b</sup> |
|------------------------------------------------|-----------------------------|-----------------------------|
| <b>Retinopathy and DM status</b>               |                             |                             |
| Both DM and retinopathy v.s. Retinopathy only  | 1.28 (0.86-1.88)            | 1.10 (0.68-1.76)            |
| Both DM and retinopathy v.s. DM only           | 1.43 (0.92-2.21)            | 1.28 (0.82-2.01)            |
| <b>Retinopathy and HBP status</b>              |                             |                             |
| Both HBP and retinopathy v.s. Retinopathy only | 0.97 (0.63-1.49)            | 0.71 (0.44-1.14)            |
| Both HBP and retinopathy v.s. HBP only         | <b>1.54 (1.17-2.03)</b>     | 1.23 (0.92-1.63)            |
| <b>Retinopathy and CKD status</b>              |                             |                             |
| Both CKD and retinopathy v.s. Retinopathy only | 1.50 (0.99-2.25)            | 1.00 (0.66-1.54)            |
| Both CKD and retinopathy v.s. CKD only         | <b>1.51 (1.15-1.96)</b>     | 1.20 (0.92-1.56)            |
| <b>Retinopathy and CVD status</b>              |                             |                             |
| Both CVD and retinopathy v.s. Retinopathy only | <b>1.57 (1.05-2.35)</b>     | 1.11 (0.69-1.78)            |
| Both CVD and retinopathy v.s. CVD only         | 1.38 (0.96-1.99)            | 1.07 (0.70-1.64)            |

Abbreviations: DM, diabetes mellitus; HBP, high blood pressure; CKD, chronic kidney disease; CVD, cardiovascular disease.

Boldface indicates statistical significance. Values are hazard ratios (95% confidence interval).

All-cause mortality was assessed through December 31, 2015.

<sup>a</sup> Model 1: Adjusted for age, gender, race, education level, marital status, income status.

<sup>b</sup> Model 2: Model 1 plus additional adjustments for BMI, smoking status, drinking status, hypertension, diabetes mellitus, diabetes duration, hypercholesterolaemia, C-reactive protein, self-rated health status, walking disability, self-reported history of cardiovascular disease and chronic kidney disease.
